# Supplementary material for: Novel retrotransposed imprinted locus identified at human 6p25
Source: PubMed Central journal article supplement — Nucleic Acids Res. 2011 Mar 18;39(13):5388–400. doi: 10.1093/nar/gkr108 (PMC3141237; doi:10.1093/nar/gkr108), 2011-03-18
Supplement: supp_gkr108_Supporting_Materials_01-24-2011.pdf [file supp_gkr108_Supporting_Materials_01-24-2011.pdf]

**Figure S1. Detection of *FAM50B-AS* by Northern blot.** Using DIG-labeled probe complementary to the *FAM50B-AS*, generated using the FAM-19R primer, a band was detected between 1.0 and 2.0kb. The same band was observed when the probe generated using the FAM-19R primer (data not shown). M, 0.1-2kb RNA ladder; CB1 (96-day gestation), conceptus brain; CK, conceptus liver; CTe conceptus testis; CL, conceptus liver; CB1 (88-day gestation), ATe, adult testis; AL, adult liver; AB, adult brain. The positions of the anticipated products are indicated by the arrows.

**Figure S2. Imprinting and paternal expression of *FAM50B*.** **A**, *FAM50B* imprinting in human adult tissues. Genomic DNA from a normal adult human heterozygous for polymorphism rs6597007 (G/C). cDNA sequencing demonstrates monoallelic expression of *FAM50B* in adult testis and liver. **B**, Paternal expression of *FAM50B*. Pedigree of a matched maternal genotype (C/C) with an informative (G/C) 113-day gestation human conceptus. The cDNA sequences from the brain of the conceptus demonstrate that *FAM50B* is expressed monoallelically from the paternal allele (representative DNA sequences from one individual out of four matched maternal/informative conceptuses that demonstrated paternal imprinted expression at the *FAM50B* locus). The position of SNP rs6597007 (G/C) used to determine allelic expression is indicated by the arrows.

**Figure S3. Allele-specific expression of *FAM50B* and *FAM50B-AS*.** **A**, Strand-specific RACE-PCR results of *FAM50B* and *FAM50B-AS* on an agarose gel. 3' RACE-PCR was performed by independently amplifying the 3' end of *FAM50B* and *FAM50B-AS* containing SNP rs6597007. The results show 526bp products of the *FAM50B* and 1310bp products of the *FAM50B-AS* in human tissues. M, low DNA mass ladder. N, control reactions performed using cDNA prepared in the

absence of primers to eliminate the possibility of genomic DNA and RNA contamination. CB, conceptus brain; AL, adult liver; ATe, adult testis. The positions of the anticipated products are indicated by the arrows. **B**, cDNA sequencing demonstrates monoallelic expression of *FAM50B* and *FAM50B-AS* in human tissues. S, *FAM50B* sense transcript; AS, *FAM50B* antisense transcript.

**Figure S4. Expression of *FAM50B* and *FAM50B-AS*.** Expression of *FAM50B* (**A**) and *FAM50B-AS* (**B**) is shown for a panel of human conceptus and adult tissues. Transcription levels were determined using quantitative RT-PCR, normalized to levels of *GAPDH* determined from parallel runs. CL, conceptus liver; CB, conceptus brain; CG, conceptus gut; CK, conceptus kidney; CP, placenta; CTh, conceptus thymus; CTe, conceptus testis; AB, adult brain; AL, adult liver; ATe, adult testis.

**Figure S5. Imprinting analysis of Human *C6orf145*.** Biallelic expression of *C6orf145* demonstrated in cDNA from brain, heart, kidney, lung, muscle, and placenta tissues from a human conceptus heterozygous for polymorphism rs226959 (C/G) in genomic DNA. The position of the SNP used to determine allelic expression is indicated by the arrows.

**Figure S6. *FAM50B* gene expression in opossum and mouse tissues.** Opossum *FAM50B* is expressed in kidney, liver, embryo and placenta (**A**), but expression is undetectable in the brain. Mouse *FAM50B* is expressed in liver, kidney, brain, and testes (**B**). M, 100 bp DNA ladder.

**Figure S7. Allele-specific methylation at the *FAM50B* locus in testicular germ cell tumors (TGCTs).** Clones obtained from bisulfite-treated DNA demonstrate that allele-specific methylation is partially lost in seminomas S2 (**A**) and S3 (**B**). CpG sites are represented by circles. Unfilled circle, unmethylated CpG site; filled circle, methylated CpG site.

**Table S1.** Primers used in this study for human *FAM50B*.

| Primer Name | Nucleotide Sequence (5' to 3')                              | Position*      |
|-------------|-------------------------------------------------------------|----------------|
| FAM-1F      | AGGAAGAGAGTTTTAGGAAAAGTTTTAGGTTTTTGG                        | -1406 to -1382 |
| FAM-1R      | CAGTAATACGACTCACTATAGGGAGAAGGCTAAACCTCTAACATACCAATTTCCAC    | -1153 to -1128 |
| FAM-2F      | AGGAAGAGAGTTGGGGTTATAAGAAAGAATTATAGGT                       | -918 to -892   |
| FAM-2R      | CAGTAATACGACTCACTATAGGGAGAAGGCTAACCCATAAAAAAATACCAAACCTCC   | -496 to -473   |
| FAM-3F      | AGGAAGAGAGTTAGGAGTTTGGTATTTTTTTTAGGG                        | -498 to -473   |
| FAM-3R      | CAGTAATACGACTCACTATAGGGAGAAGGCTAAATAACCAACCAACCTAACATATC    | -179 to -153   |
| FAM-4F      | AGGAAGAGAGGAAATTTGGTGTGGTGGTATATTGTT                        | -194 to -168   |
| FAM-4R      | CAGTAATACGACTCACTATAGGGAGAAGGCTCTCCCTAACCAAAACCTCCTAC       | 237 to 260     |
| FAM-5F      | AGGAAGAGAGGGTAGGAGGTTTTGGTTAGGGA                            | 238 to 260     |
| FAM-5R      | CAGTAATACGACTCACTATAGGGAGAAGGCTCAAATAAAATCCTCCTTAATAAACATAA | 714 to 743     |
| FAM-6F      | AGGAAGAGAGGAGGAGATGGAGGTTATTTTTAGTTA                        | 558 to 284     |
| FAM-6R      | CAGTAATACGACTCACTATAGGGAGAAGGCTCATCAACAATAACACAACCAATATAAA  | 1118 to 1144   |
| FAM-7F      | ACAGCGGGGTAGCATCAG                                          | -860 to -843   |
| FAM-7R      | CTGGAGGAGGCGCTTCTG                                          | -641 to -624   |
| FAM-8F      | TTTTGAGGAGAGTGTTAGGTTTTTG                                   | -472 to -495   |
| FAM-8R      | ACTACACTTTAACTCAATATCCCATAA                                 | -998 to -971   |
| FAM-9F      | CTCATTTCTAGGCCCATCA                                         | 1020 to 1039   |
| FAM-9R      | TGGTTTTCAATACAGCTCAGCA                                      | 1205 to 1225   |
| FAM-10R     | TTTTACAAATATTAATTCA                                         | 1453 to 1471   |
| FAM-11F     | GCCTCCTCCTTGCTGTGTAG                                        | 1335 to 1354   |
| FAM-11R     | CCCAGCTAAAGCCCACTAGA                                        | 1652 to 1671   |
| FAM-12F     | AGATGGAGGTCACCTTCA                                          | 551 to 568     |
| FAM-13F     | CCTTGATTTCTTCCCCAAA                                         | 1060 to 1079   |
| FAM-14F     | GCCTCCTCCTTGCTGTGTAG                                        | 1335 to 1354   |
| FAM-14R     | TCCATGCTCATAACCACCAG                                        | 1277 to 1296   |
| FAM-15F     | CGCGTTTTTCTCTTTGCT                                          | -28 to -46     |
| FAM-15R     | CCTCGTCCTTCACTTTCTCG                                        | 530 to 550     |
| FAM-16F     | GTCAGCTCCCGGTGTCT                                           | -367 to -351   |
| FAM-16R     | CGCATGGTGCCCTTGTACT                                         | 8 to 26        |
| FAM-17F     | GCGCATGGTGCCCTTGTACT                                        | 10 to 25       |
| FAM-17R     | GGCGCAGAGCTGAGCATT                                          | -79 to -96     |
| FAM-18F     | TCTGGCAGGAAGCTGGTGTCCA                                      | 443 to 464     |
| FAM-18R     | TAATACGACTCACTATAGGGCAGCTGGCCAAGCGCCAGCA                    | 261 to 278     |
| FAM-19F     | GTGGGCCAGTCATGGTTTCA                                        | 1218 to 1238   |
| FAM-19R     | TAATACGACTCACTATAGGGCACCAGTCACTTGATTTCTGTA                  | 1040 to 1059   |
| GAPDH-F     | CTCTCTGCTCCTCTGTTTCGAC                                      |                |
| GAPDH-R     | TGAGCGATGTGGCTCGGCT                                         |                |

\*Positions relative to the translational start codon

**Table S2.** Primers used in this study for opossum and mouse *FAM50B*.

| Primer Name  | Nucleotide Sequence (5' to 3')                             |
|--------------|------------------------------------------------------------|
| Opossum-1F   | CACGGAGGAGAACATGATGA                                       |
| Opossum-1R   | GTTTTTCCCCGCTCCTTACC                                       |
| Opossum-2F   | TGAATGACATGAAGGCCAAA                                       |
| Opossum-2R   | CAAGAAGTCTGCATGGTGT                                        |
| Opossum-3F   | ACACCATGCAGCAGTTCTTG                                       |
| Opossum-3R   | TGGATCATAAGGCTCCCAAC                                       |
| Opossum-RT-S | TGATCTGATGGTGTACTTG                                        |
| Opossum-4F   | AGGAAGAGAGTTAGGTAATGATGGTGTGAGGTT                          |
| Opossum-4R   | CAGTAATACGACTCACTATAGGGAGAAGGCTATTAACCTTCATCATATTCTCCTCC   |
| Opossum-5F   | AGGAAGAGAGTTGGTTTTATGTTATTTAGGGTGA                         |
| Opossum-5R   | CAGTAATACGACTCACTATAGGGAGAAGGCTATCACATTTAAATCCAAAACCTCCT   |
| Opossum-6F   | AGGAAGAGAGGGTTATGGTTTAAATAAGGGGGT                          |
| Opossum-6R   | CAGTAATACGACTCACTATAGGGAGAAGGCTTCTACTTAACCTCCATTCCCTACC    |
| Opossum-7F   | AGGAAGAGAGGGTTTTTTGTAGAATTGTTGTATGG                        |
| Opossum-7R   | CAGTAATACGACTCACTATAGGGAGAAGGCTTCACCTAAATAACATAAAAACCCAAA  |
| Mouse-1F     | TGACGCAGCTGACTGGTTT                                        |
| Mouse-1R     | CTTGGCCTTCATGTCATTCA                                       |
| Mouse-2F     | GACAAGAAGTTCTCGGCACA                                       |
| Mouse-2R     | GAGCCATCCCAGTAGCTGAA                                       |
| Mouse-3F     | GAAGCGCGAGAAGGTGAAG                                        |
| Mouse-3R     | ACGCCAGGTACAGAACCAAC                                       |
| Mouse-4F     | AAAAGCCTTGCGCTGAACT                                        |
| Mouse-4R     | CTTGGCCTTCATGTCATTCA                                       |
| Mouse-RT-S   | GTATTTATTAATTTTCGAT                                        |
| Mouse-5F     | AGGAAGAGAGAAGGTTTTGTGTTGTTATTTAGTGG                        |
| Mouse-5R     | CAGTAATACGACTCACTATAGGGAGAAGGCTAATTCCTAACCTAAATTTCTCCCT    |
| Mouse-6F     | AGGAAGAGAGGTGTTAAAGTTTAGGGTTTTGGTGA                        |
| Mouse-6R     | CAGTAATACGACTCACTATAGGGAGAAGGCTAACCCACAATTCAAAAATCTATCC    |
| Mouse-7F     | AGGAAGAGAGTTTTTTGGAATTGGAGTTAGAGATG                        |
| Mouse-7R     | AGGAAGAGAGTTAGTTGTGTGTTTGGTTGGATT                          |
| Mouse-8F     | CAGTAATACGACTCACTATAGGGAGAAGGCTTCCAACAACCTACAATAAAAAAAA    |
| Mouse-8R     | CAGTAATACGACTCACTATAGGGAGAAGGCTAAAAACATTACCCCAAAAAACAAAAT  |
| Mouse-9F     | AGGAAGAGAGTAAATGTTATGGGAAATTGAAAGA                         |
| Mouse-9R     | CAGTAATACGACTCACTATAGGGAGAAGGCTAAAAAAAACAAAACCTTCTCCTACC   |
| Mouse-10F    | AGGAAGAGAGTTGAGAAATTTTTGGGTTGGTTA                          |
| Mouse-10R    | CAGTAATACGACTCACTATAGGGAGAAGGCTACTCTAACATTCCATATCATTCCAAAA |
| Mouse-11F    | AGGAAGAGAGGATTTTTGGAATGATATGGAATGTT                        |
| Mouse-11R    | CAGTAATACGACTCACTATAGGGAGAAGGCTAATCCCAAAAACTTTCATCCTAAC    |
| Mouse-12F    | AGGAAGAGAGAGGGGAAGTTTTAAGGATTTTTTT                         |
| Mouse-12R    | CAGTAATACGACTCACTATAGGGAGAAGGCTTTTTAACCTACCCAATCCCTATTTTC  |
| Mouse-13F    | AGGAAGAGAGAGAAATAGGGATTGGGTAGGTTAAA                        |
| Mouse-13R    | CAGTAATACGACTCACTATAGGGAGAAGGCTTTACCCAATTTCTTCTTAACTCCAA   |
| Mouse-14F    | AGGAAGAGAGGGAGATTATTTTTAGTTATTGGGATGG                      |
| Mouse-14R    | CAGTAATACGACTCACTATAGGGAGAAGGCTACACAAAAAACCAAAACAAAAAC     |
| Mouse-15F    | AGGAAGAGAGTTAGTTGGTGGGTTAGTAGATTGG                         |
| Mouse-15R    | CAGTAATACGACTCACTATAGGGAGAAGGCTCAAAAAACAAAACAAAAATCCAAAA   |
| Mouse-16F    | AGGAAGAGAGATAATTTTTGGTGATATTGGGTGTTG                       |
| Mouse-16R    | CAGTAATACGACTCACTATAGGGAGAAGGCTAAAAAACAAACATCTAACCAACTAAA  |
| Mouse-17F    | AGGAAGAGAGTAGGAAAATTTTATGGGAGGATTGT                        |
| Mouse-17R    | CAGTAATACGACTCACTATAGGGAGAAGGCTAATAAAAAAACAAACCCCAATTTTC   |
| Mouse-18F    | AGGAAGAGAGGGAGTAGTGAATTTTTGTTGTT                           |
| Mouse-18R    | CAGTAATACGACTCACTATAGGGAGAAGGCTTACCCACTATAAAATATCCAACCCAA  |

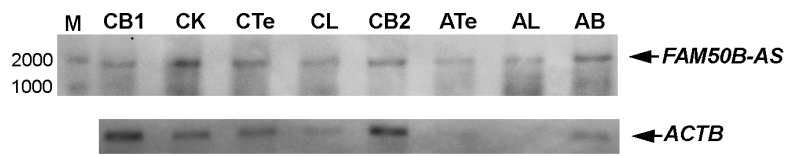

**Figure S1**

**A**

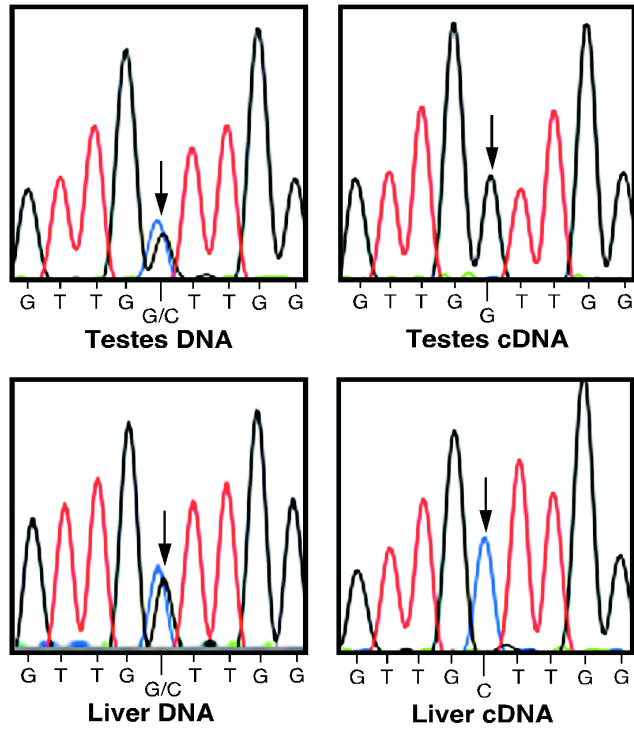

**B**

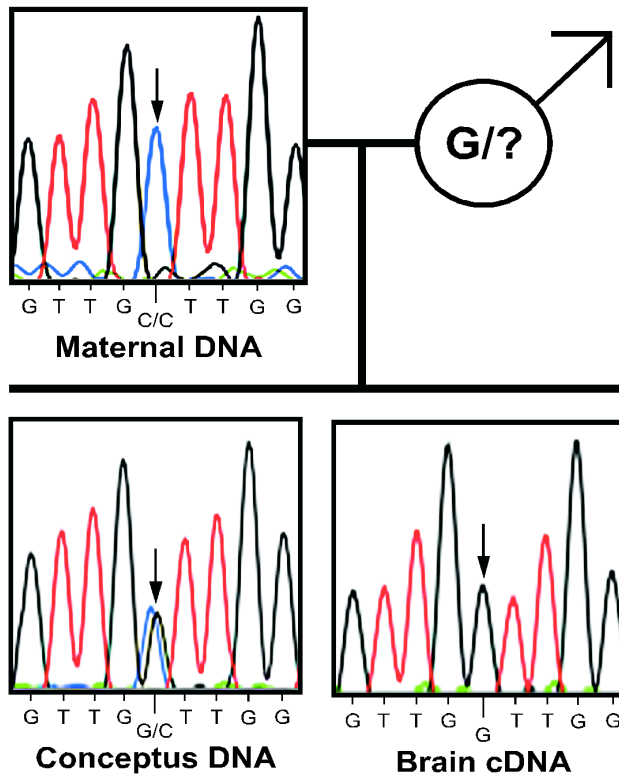

Figure S2

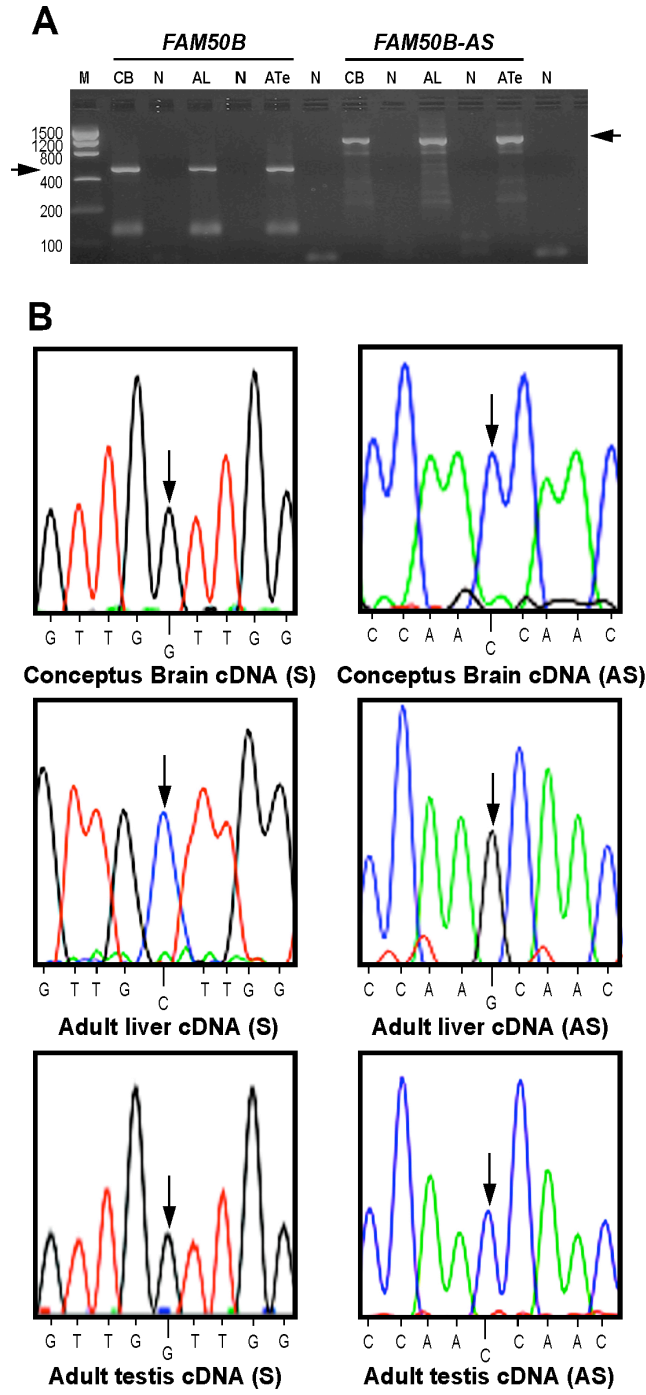

Figure S3



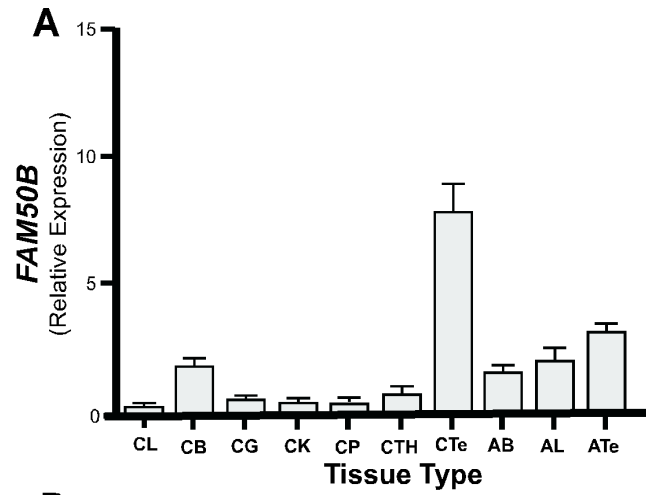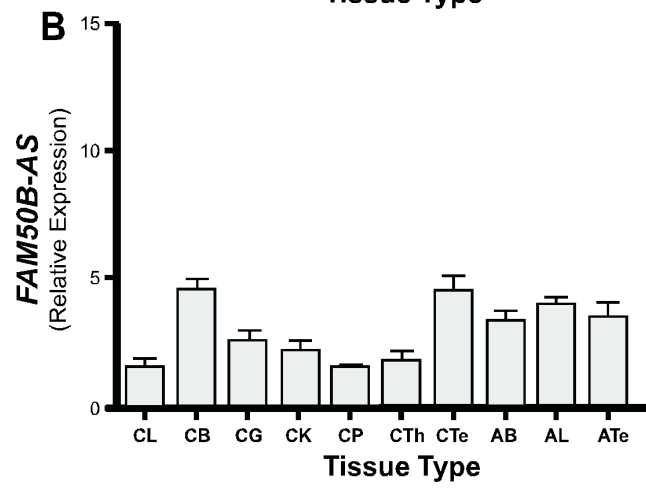

**Figure S4**

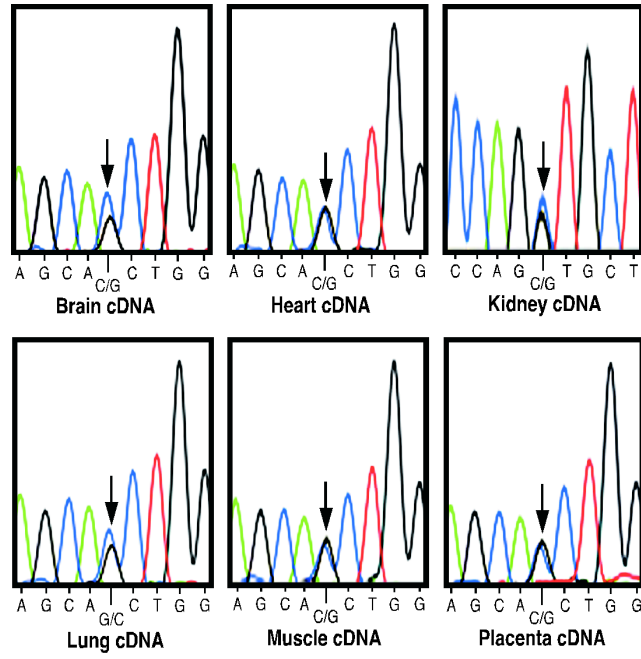

**Figure S5**

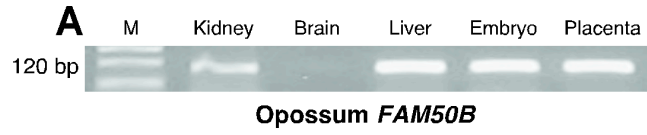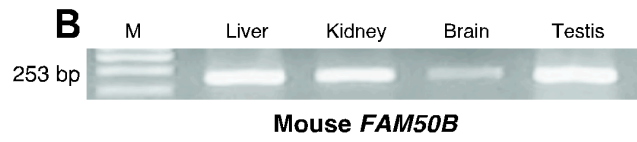

**Figure S6**

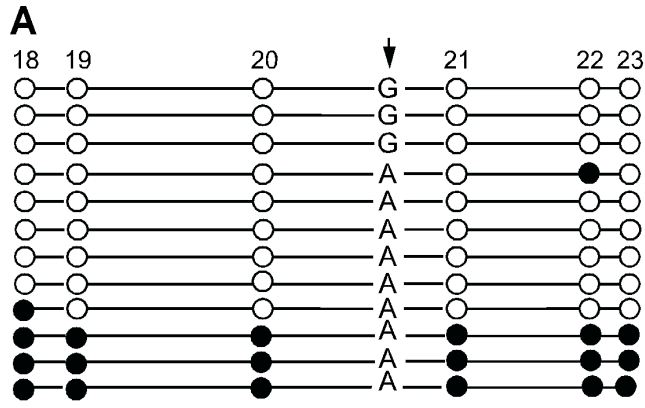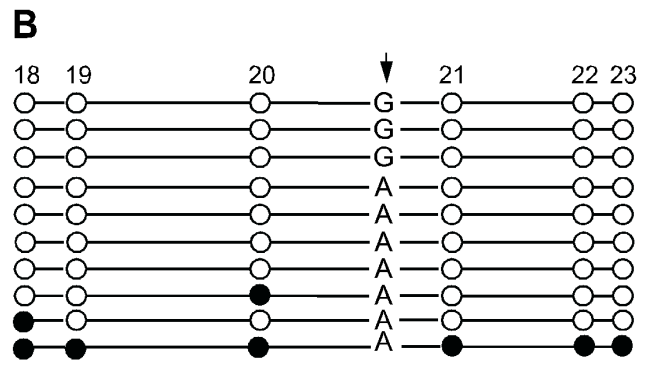

Figure S7
